# Supplementary material for: Cranial osteology of the ankylosaurian dinosaur formerly known asMinmisp. (Ornithischia: Thyreophora) from the Lower Cretaceous Allaru Mudstone of Richmond, Queensland, Australia
Source: PeerJ journal article supplement (doi:10.7717/peerj.1475), 2015-12-08

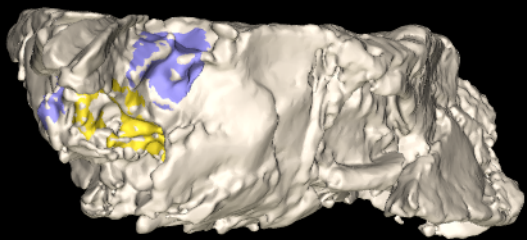

Supplement: Suppl._1_Minmi_3DPDF.pdf [file Suppl._1_Minmi_3DPDF.pdf]
